# Supplementary material for: pH-responsive drug release from porous zinc sulfide nanospheres based on coordination bonding
Source: Royal Society of Chemistry journal article supplement (doi:10.1039/c4ra05277c), 2014-01-01
Supplement: c4ra05277c1.pdf [file c4ra05277c1.pdf]

## pH-Responsive Drug Release from Porous Zinc Sulfide Nanospheres based on Coordination Bonding

Dong Zhu,\* Hong-Mei Wen,\* Wei Li, Xiao-Bing Cui, Li Ma and An Kang  
College of Pharmacy, Nanjing University of Chinese Medicine Nanjing 210023, P. R. China  
Tel: +86 25 85811839. Fax: +86 25 85811839

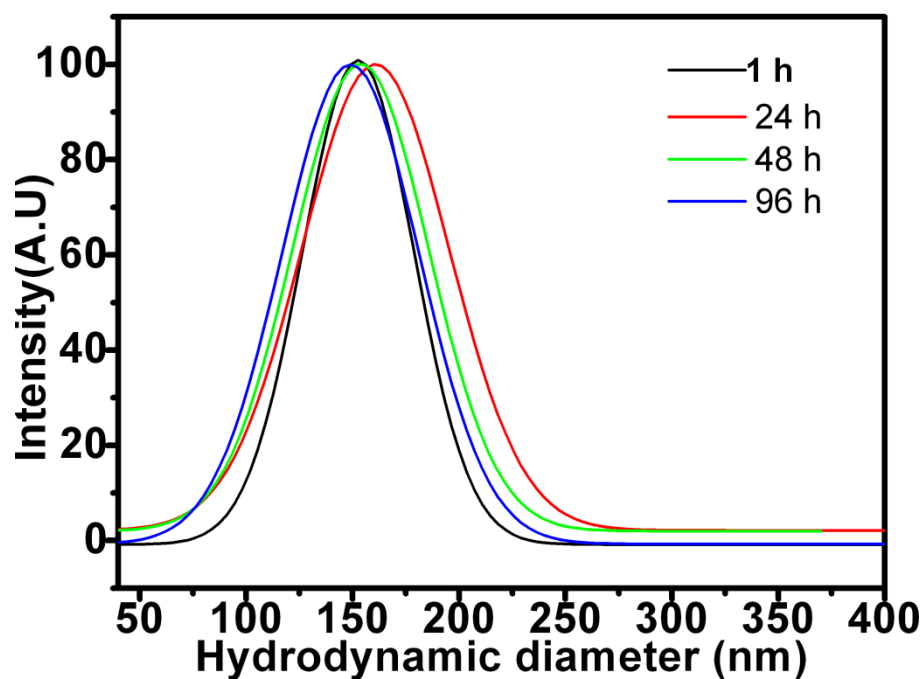

Figure S1 The hydrodynamic diameter of DOX-Zn<sup>2+</sup>-PAA-PZNs in DMEM+10%FBS.
